# Supplementary material
Source: HighWire-hosted journal article supplement (http://www.cmaj.ca/highwire/filestream/58346/field_highwire_adjunct_files/0/image-vujovic_appendix_1.pdf)
Supplement: image-vujovic_appendix_1.pdf [file image-vujovic_appendix_1.pdf]

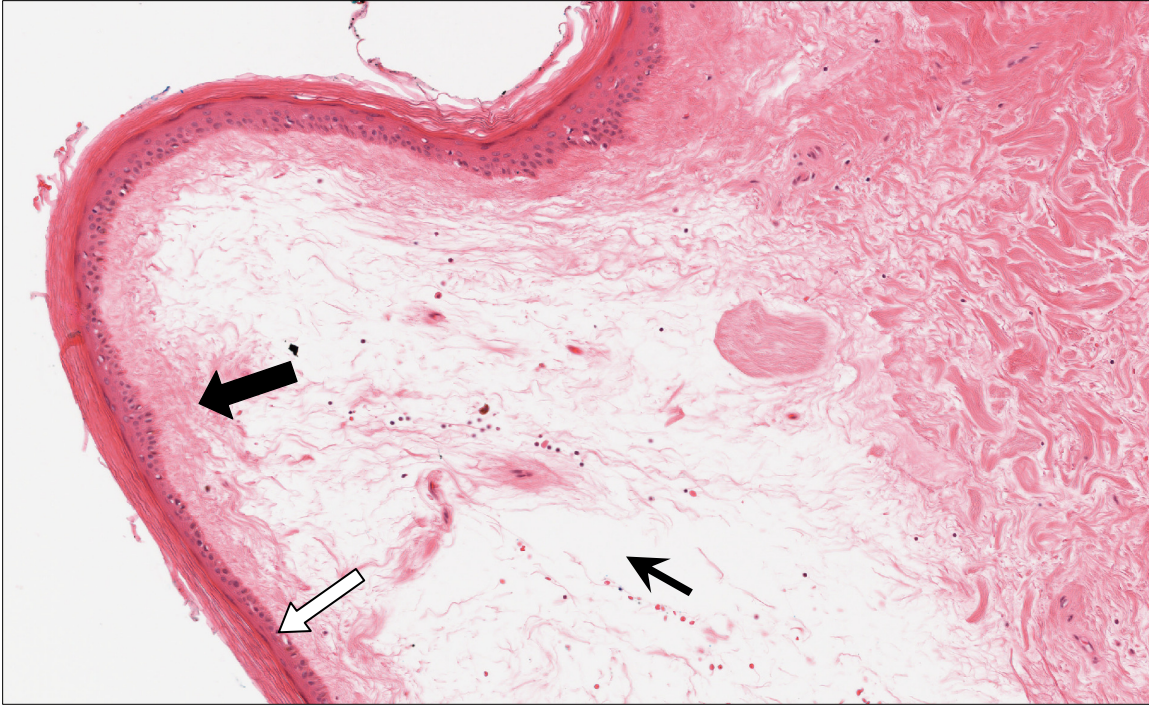

**Appendix 1: Histopathology of skin from the left breast of a 77-year-old woman with lichen sclerosus two years after breast-conserving surgery and radiation therapy for breast cancer (T2N0M0).** Visible are subepidermal edema (small black arrow), focal hyalinization (large black arrow) and scattered chronic inflammation (hematoxylin and eosin stain,  $\times 100$  magnification). The overlying epidermis is flattened with loss of normal rete ridges (white arrow). These changes are in keeping with lichen sclerosus.
